# Supplementary material for: A series of high-temperature molecular ferroelectric crystals: chlorine doped diisopropylammonium bromide
Source: Royal Society of Chemistry journal article supplement (doi:10.1039/c5tc04398k), 2016-01-01
Supplement: c5tc04398k1.pdf [file c5tc04398k1.pdf]

## Electronic Supplementary Information

### Series of High-Temperature Molecular ferroelectric crystals: Chlorine doped

#### Diisopropylammonium Bromide

Kaige Gao, Chuang Liu, Zepeng Cui, Jiansheng Zhu, Linsong Gao, Hong-Ling Cai, Xiaoshan Wu

*Collaborative Innovation Center of Advanced Microstructures, Lab of Solid State Microstructures,  
School of Physics, Nanjing University, Nanjing 210093, P. R. China*

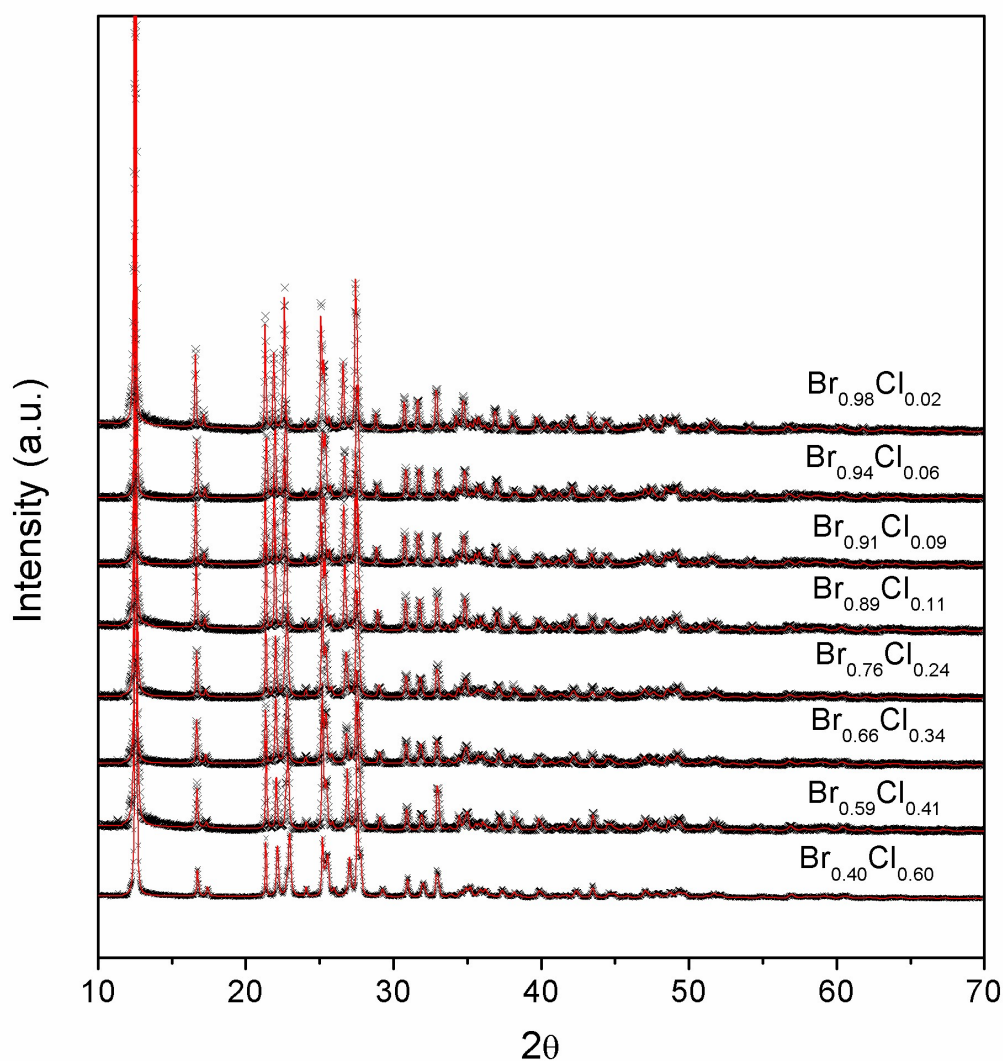

Fig. S1. Rietveld refinements of PXRD pattern of the obtained chlorine doped DIPAB

with  $P2_1$  phase. The black “×” represents the measured XRD pattern and the red line is the refinement curve.

Table S1 The lattice parameters and  $r_{wp}$  of the chlorine doped DIPAB samples got by the Rietveld refinements of PXRD pattern

| Measured chlorine content x | a         | b         | c         | $\beta$         | volume    | $r_{wp}$ |
|-----------------------------|-----------|-----------|-----------|-----------------|-----------|----------|
| 0                           | 7.8614(6) | 8.0978(5) | 7.8943(6) | 116.280(5)<br>) | 450.61(6) | 10.83%   |
| 0.02                        | 7.8661(3) | 8.1092(3) | 7.9038(2) | 116.272(2)<br>) | 452.10(3) | 10.04%   |
| 0.06                        | 7.8665(3) | 8.1096(2) | 7.9067(2) | 116.250(2)<br>) | 452.39(2) | 8.24%    |
| 0.09                        | 7.8605(3) | 8.1062(3) | 7.9000(2) | 116.192(2)<br>) | 451.69(3) | 9.55%    |
| 0.11                        | 7.8541(3) | 8.0991(3) | 7.8984(2) | 116.116(2)<br>) | 451.13(2) | 9.87%    |
| 0.24                        | 7.8288(4) | 8.0812(4) | 7.8780(3) | 115.953(3)<br>) | 448.15(4) | 9.92%    |
| 0.34                        | 7.8275(4) | 8.0798(3) | 7.8796(3) | 115.889(3)<br>) | 448.32(3) | 9.51%    |
| 0.41                        | 7.8105(4) | 8.0651(5) | 7.8631(2) | 115.868(3)<br>) | 445.69(4) | 10.99%   |
| 0.60                        | 7.7472(4) | 8.0100(4) | 7.8165(3) | 115.528(3)<br>) | 437.70(4) | 9.88%    |

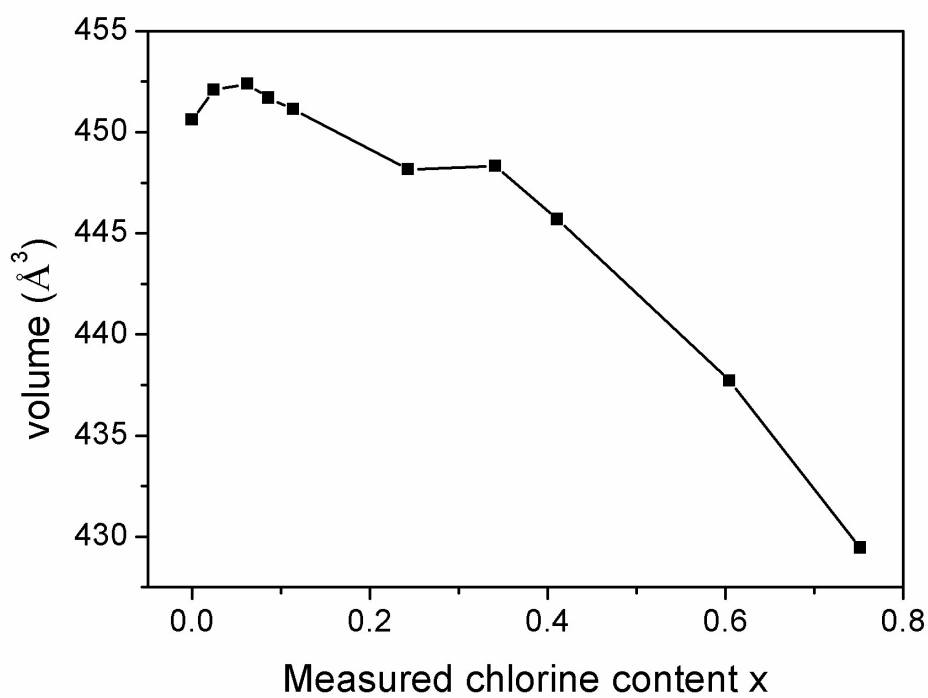

Fig. S2 The unit cell volume of the chlorine doped DIPAB versus the measured chlorine content.

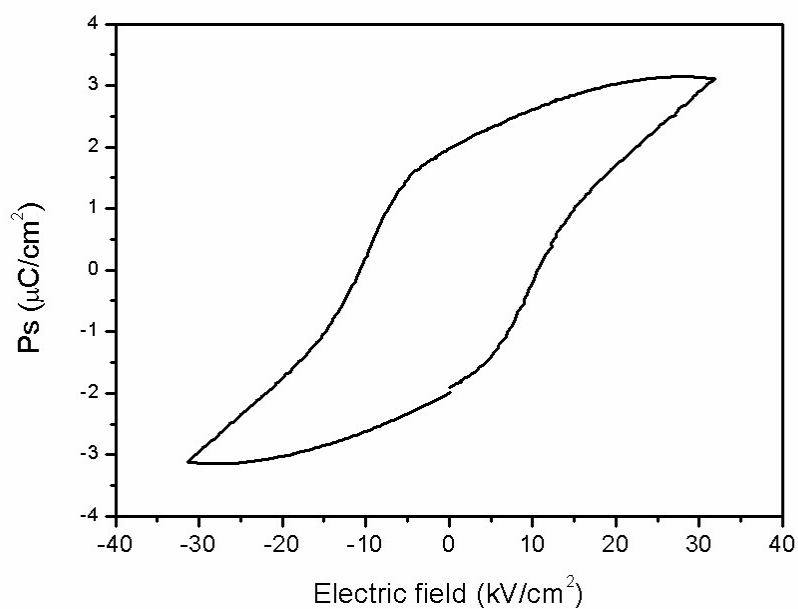

Fig. S3 The ferroelectric hysteresis loop of  $C_6H_{16}NBr_{0.59}Cl_{0.41}$  at 423K.
